# Supplementary material
Source: publisher site journal article supplement (https://www.spandidos-publications.com/1940/downloadSupplementary)

Figure S1. STRING analysis of a PPI network for all differentially expressed proteins. (A) PPI analysis for the 72 differentially expressed proteins from the -Treatment vs. control and +Treatment vs. control analyses according to the STRING database using a 'highest confidence' threshold (score of 0.9). Interactions between proteins are indicated by lines. (B) PPI network degree of the top 30 differentially expressed proteins. The network degree represents the total connections of one protein, which can be used as a rough indication of the centrality of the protein within the PPI networks. PPI, Protein-protein analysis; STRING, Search Tool for the Retrieval of Interacting Genes/Proteins.

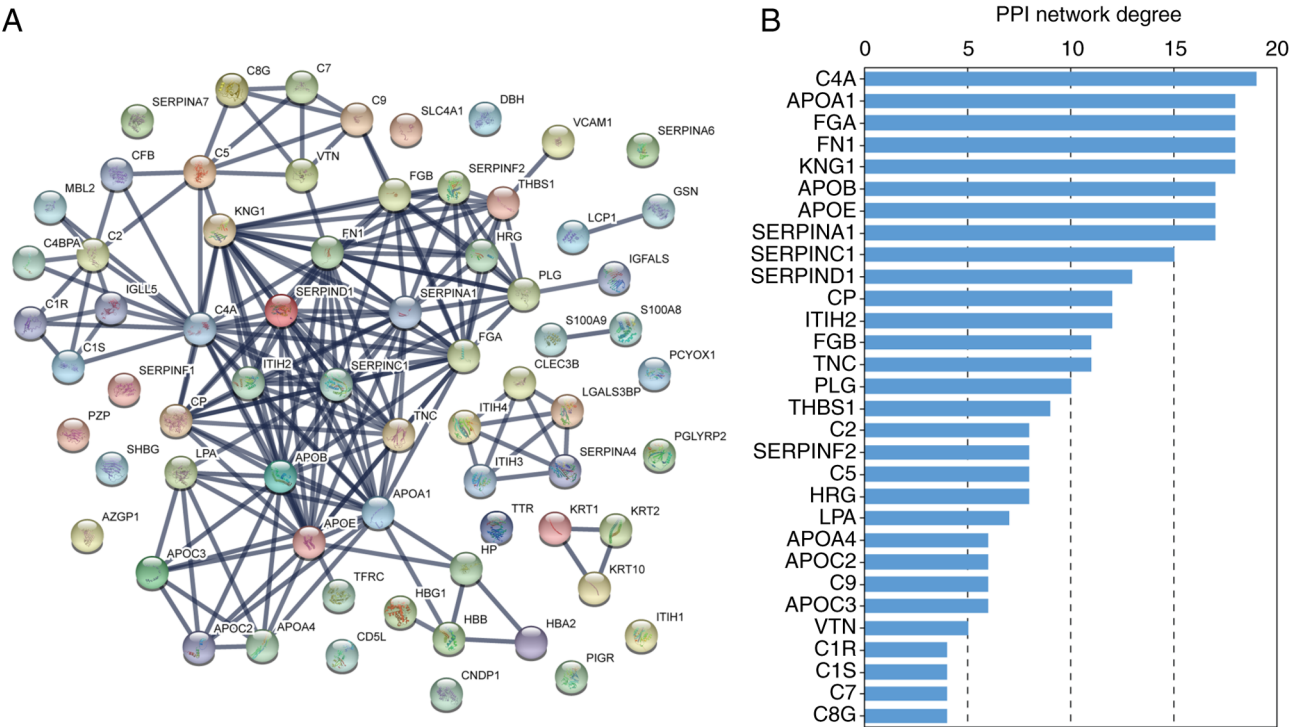

Supplement: Supplementary file 1 [file downloadSupplementary]
